# Supplementary material for: Explore Your Local Biodiversity – How School Grounds Evoke Visions of Sustainability
Source: Oxford University Press journal article supplement (doi:10.1525/abt.2020.82.9.606), 2020-11-01
Supplement: abt8209_04_i2_fiedler_supplemental_material_1.docx [file abt8209_04_i2_fiedler_supplemental_material_1.docx]

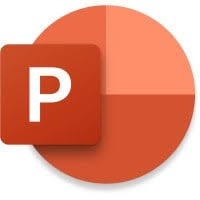

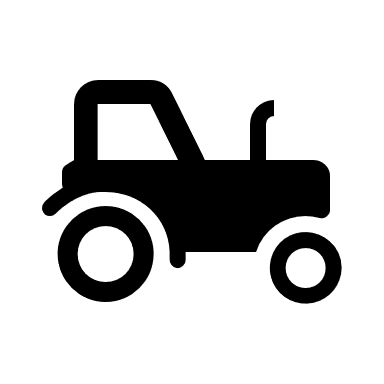


1. Open the PowerPoint App on your tablet.
2. Choose the file named „Marcus“ and press the play button

You can rewatch each section of the video.

Watch the interview with Marcus, a farmer.

Take notes regarding the following questions:

- What does Marcus need his farmland for?
- What is manure?
- How are yield and the use of manure connected?
- What is the point of wildflower stripes?

Work Station 1: Farmer Marcus

**Station 2**


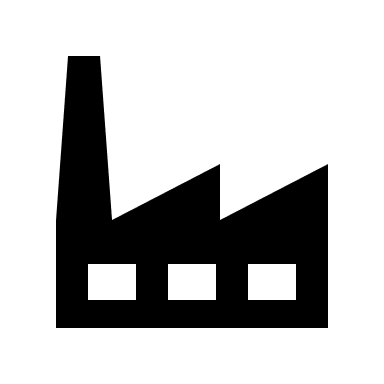


**Station 1**


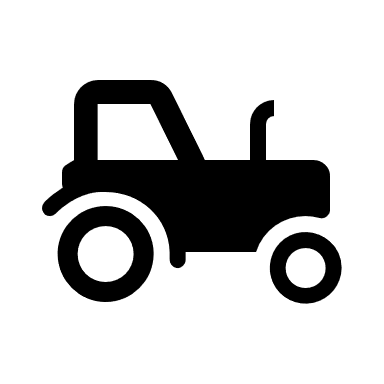


**Station 3**


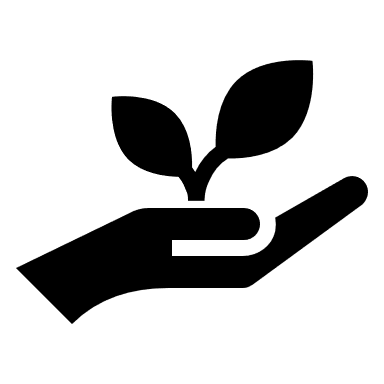


**Station 4**


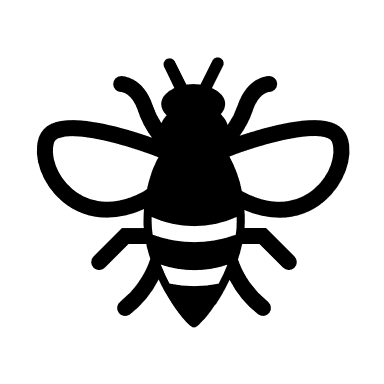


**Temperature**


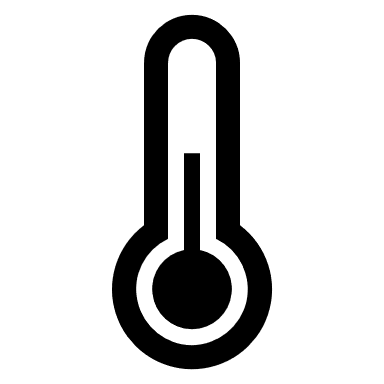


**Humidity**


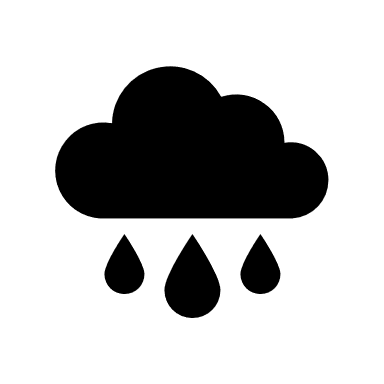


**Light**


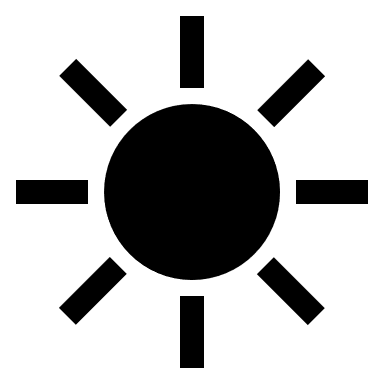


**Insects & Plants**


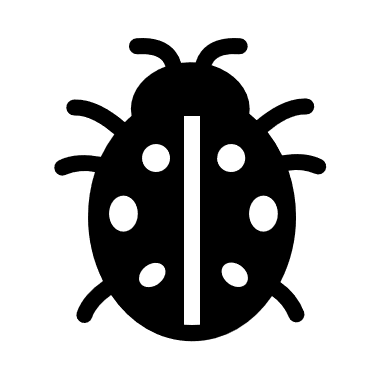

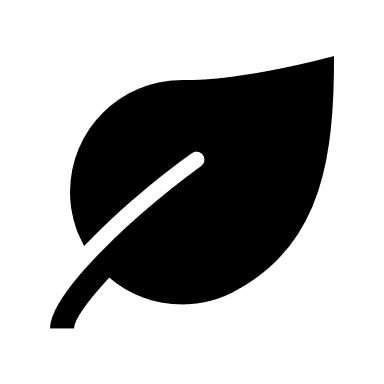


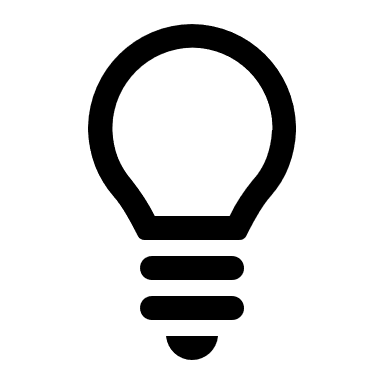

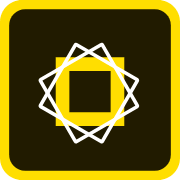


You can find 8 different measures on your table.

1. Choose as a group four different measures you consider the most sustainable.
2. Choose two students from your group, who will present your measures to the rest of the class.
3. Ope the AdobePostApp on your tablet and choose one of the prepares templates. Enter your four measures here.

You can edit e.g. the color or font of your poster.
