# Supplementary material for: Explore Your Local Biodiversity – How School Grounds Evoke Visions of Sustainability
Source: Oxford University Press journal article supplement (doi:10.1525/abt.2020.82.9.606), 2020-11-01
Supplement: abt8209_04_i2_fiedler_supplemental_material_2.docx [file abt8209_04_i2_fiedler_supplemental_material_2.docx]

List of Materials needed for 20 students

| Item | Amount | Used for |
| --- | --- | --- |
| Hands-on model of flower shapes | 1 each | Clarification of flower types |
| Researcher Diary “intensive” | 5x | With instructions for digital/ analog assignments |
| Researcher Diary “extensive” | 5x |
| Researcher Diary “politician” | 5x |
| Researcher Diary “NGO” | 5x |
| Moisture Analyzer | 4x | Measurement of abiotic factors |
| Luminometer | 4x |
| Infrared thermometer | 4x |
| Simple Calculator | 4x | Determining the average score of measurements on the pasture |
| Measures | 4x | Printed for each expert group, can be replaced by a simple list |
|  |  |  |
| If digital version is used |  |  |
| Tablets | 10x |  |
| Wireless transmitter | 1x | For presentation of posters, measurements, etc. |
| Plant identification app like *iFlora* | 10x | Must be suited for local flowers |
| Poster app like *Adobe Spark Post* | 4 |  |
| Expert Video | 2x (1 each) |  |
| Expert Presentation | 2x (1 each) |  |
| If analog version is used |  |  |
| Poster Toolkit | 4x | colored sheets of paper, scissors, markers, etc. |
| Plant identification guide | 10x | Must be suited for local flowers |
| Expert information | 1 each |  |
|  |  |  |
